# Supplementary material for: Analysis of paternal lineages in Brazilian and African populations
Source: PubMed Central journal article supplement (PMC3036106; doi:10.1590/s1415-47572010005000067), 2010-09-01
Supplement: gmb-33-3-422-suppl1.pdf [file gmb-33-3-422-suppl1.pdf]

Table S1. Y chromosome haplotype distribution in the Manaus population sample (N=42).

| code | n | DYS19 | DYS389I | DYS389II | DYS390 | DYS391 | DYS392 | DYS393 | DYS385 | HG              |
|------|---|-------|---------|----------|--------|--------|--------|--------|--------|-----------------|
| M1   | 1 | 14    | 13      | 29       | 24     | 11     | 13     | 13     | 10,13  | F*(xQ1a3a)-M213 |
| M2   | 1 | 15    | 12      | 28       | 22     | 10     | 11     | 13     | 12,12  | F*(xQ1a3a)-M213 |
| M3   | 1 | 14    | 13      | 29       | 24     | 11     | 13     | 13     | 11,14  | F*(xQ1a3a)-M213 |
| M4   | 1 | 14    | 13      | 29       | 25     | 11     | 13     | 13     | 11,15  | F*(xQ1a3a)-M213 |
| M5   | 1 | 14    | 14      | 31       | 23     | 10     | 11     | 12     | 13,16  | F*(xQ1a3a)-M213 |
| M6   | 1 | 15    | 12      | 28       | 24     | 10     | 11     | 13     | 13,17  | F*(xQ1a3a)-M213 |
| M7   | 1 | 13    | 13      | 29       | 24     | 9      | 11     | 13     | 13,14  | E - M35         |
| M8   | 1 | 14    | 12      | 30       | 25     | 10     | 14     | 13     | 13,17  | Q1a3a - M3      |
| M9   | 1 | 14    | 12      | 28       | 23     | 10     | 11     | 13     | 13,14  | F*(xQ1a3a)-M213 |
| M10  | 1 | 14    | 12      | 28       | 24     | 12     | 13     | 13     | 11,14  | F*(xQ1a3a)-M213 |
| M11  | 1 | 14    | 13      | 31       | 22     | 10     | 11     | 12     | 13,16  | F*(xQ1a3a)-M213 |
| M12  | 1 | 14    | 13      | 29       | 25     | 10     | 13     | 13     | 11,15  | F*(xQ1a3a)-M213 |
| M13  | 1 | 13    | 13      | 30       | 24     | 10     | 11     | 13     | 16,18  | E - M35         |
| M14  | 1 | 13    | 14      | 30       | 23     | 10     | 14     | 13     | 14,16  | Q1a3a - M3      |
| M15  | 1 | 13    | 13      | 30       | 24     | 10     | 14     | 13     | 13,16  | Q1a3a - M3      |
| M16  | 1 | 15    | 13      | 29       | 22     | 10     | 13     | 12     | 11,15  | F*(xQ1a3a)-M213 |
| M17  | 1 | 15    | 13      | 28       | 24     | 10     | 13     | 13     | 12,13  | F*(xQ1a3a)-M213 |
| M18  | 1 | 14    | 13      | 29       | 23     | 10     | 11     | 12     | 14,16  | F*(xQ1a3a)-M213 |
| M19  | 1 | 13    | 13      | 29       | 25     | 9      | 11     | 13     | 13,14  | E - M35         |
| M20  | 1 | 15    | 13      | 29       | 23     | 11     | 14     | 13     | 11,13  | F*(xQ1a3a)-M213 |
| M21  | 1 | 14    | 13      | 29       | 23     | 11     | 13     | 13     | 11,14  | F*(xQ1a3a)-M213 |
| M22  | 1 | 14    | 13      | 28       | 25     | 11     | 13     | 13     | 11,14  | F*(xQ1a3a)-M213 |
| M23  | 1 | 16    | 13      | 28       | 23     | 10     | 11     | 13     | 12,12  | F*(xQ1a3a)-M213 |
| M24  | 1 | 13    | 13      | 31       | 25     | 10     | 14     | 13     | 14,14  | Q1a3a - M3      |
| M25  | 1 | 15    | 13      | 31       | 21     | 10     | 11     | 13     | 17,17  | E - M2          |
| M26  | 1 | 18    | 13      | 31       | 23     | 10     | 14     | 13     | 15,18  | F*(xQ1a3a)-M213 |
| M27  | 1 | 14    | 14      | 30       | 24     | 10     | 13     | 13     | 11,15  | F*(xQ1a3a)-M213 |
| M28  | 1 | 13    | 13      | 31       | 24     | 10     | 11     | 13     | 16,18  | E - M35         |
| M29  | 1 | 14    | 13      | 29       | 25     | 11     | 14     | 13     | 12,14  | F*(xQ1a3a)-M213 |
| M30  | 1 | 14    | 13      | 29       | 24     | 12     | 13     | 13     | 11,14  | F*(xQ1a3a)-M213 |
| M31  | 1 | 14    | 13      | 29       | 23     | 11     | 13     | 12     | 11,15  | F*(xQ1a3a)-M213 |
| M32  | 1 | 14    | 12      | 28       | 23     | 10     | 12     | 13     | 14,14  | F*(xQ1a3a)-M213 |
| M33  | 1 | 15    | 13      | 30       | 24     | 10     | 12     | 14     | 15,15  | F*(xQ1a3a)-M213 |
| M34  | 1 | 15    | 13      | 29       | 25     | 11     | 13     | 13     | 12,14  | F*(xQ1a3a)-M213 |
| M35  | 1 | 15    | 12      | 26       | 24     | 11     | 13     | 13     | 12,14  | F*(xQ1a3a)-M213 |
| M36  | 1 | 13    | 14      | 31       | 24     | 10     | 11     | 12     | 16,18  | E - M35         |
| M37  | 1 | 13    | 13      | 28       | 24     | 11     | 13     | 13     | 11,14  | F*(xQ1a3a)-M213 |
| M38  | 1 | 13    | 13      | 29       | 24     | 11     | 13     | 13     | 12,14  | F*(xQ1a3a)-M213 |
| M39  | 1 | 14    | 14      | 30       | 24     | 10     | 13     | 13     | 11,14  | F*(xQ1a3a)-M213 |
| M40  | 1 | 13    | 13      | 30       | 23     | 10     | 11     | 13     | 17,17  | E - M35         |
| M41  | 1 | 14    | 14      | 31       | 23     | 9      | 11     | 13     | 12,14  | E - M35         |
| M42  | 1 | 14    | 13      | 29       | 24     | 11     | 12     | 13     | 12,14  | F*(xQ1a3a)-M213 |
