# Supplementary material for: Analysis of paternal lineages in Brazilian and African populations
Source: PubMed Central journal article supplement (PMC3036106; doi:10.1590/s1415-47572010005000067), 2010-09-01
Supplement: gmb-33-3-422-suppl2.pdf [file gmb-33-3-422-suppl2.pdf]

Table S2. Y chromosome haplotype distribution in the Ribeirão Preto population sample (N=65).

| code | n | DYS19 | DYS389I | DYS389II | DYS390 | DYS391 | DYS392 | DYS393 | DYS385 | HG                             |
|------|---|-------|---------|----------|--------|--------|--------|--------|--------|--------------------------------|
| RP1  | 4 | 14    | 13      | 29       | 24     | 11     | 13     | 13     | 11-14  | F*(xQ1a3a)-M213                |
| RP2  | 1 | 13    | 14      | 30       | 24     | 9      | 11     | 13     | 13-14  | E1b1b1 - M35                   |
| RP3  | 1 | 15    | 12      | 28       | 25     | 11     | 11     | 12     | 18-18  | F*(xQ1a3a)-M213                |
| RP4  | 1 | 15    | 13      | 29       | 24     | 11     | 13     | 13     | 11-13  | F*(xQ1a3a)-M213                |
| RP5  | 2 | 14    | 13      | 29       | 24     | 11     | 13     | 13     | 11-11  | F*(xQ1a3a)-M213                |
| RP6  | 3 | 14    | 13      | 30       | 24     | 10     | 13     | 13     | 11-14  | F*(xQ1a3a)-M213                |
| RP7  | 1 | 15    | 13      | 30       | 24     | 10     | 12     | 15     | 14-15  | F*(xQ1a3a)-M213                |
| RP8  | 1 | 14    | 13      | 30       | 24     | 10     | 11     | 12     | 13-17  | F*(xQ1a3a)-M213                |
| RP9  | 1 | 14    | 13      | 29       | 23     | 10     | 13     | 14     | 11-14  | F*(xQ1a3a)-M213                |
| RP10 | 1 | 14    | 13      | 28       | 24     | 11     | 13     | 13     | 11-13  | F*(xQ1a3a)-M213                |
| RP11 | 1 | 15    | 13      | 29       | 22     | 11     | 13     | 12     | 11-14  | F*(xQ1a3a)-M213                |
| RP12 | 1 | 15    | 13      | 29       | 24     | 11     | 13     | 13     | 11-14  | F*(xQ1a3a)-M213                |
| RP13 | 1 | 14    | 13      | 30       | 24     | 10     | 13     | 13     | 11-11  | F*(xQ1a3a)-M213                |
| RP14 | 1 | 15    | 12      | 28       | 24     | 10     | 14     | 13     | 14-16  | F*(xQ1a3a)-M213                |
| RP15 | 1 | 15    | 13      | 29       | 24     | 10     | 13     | 13     | 12-14  | F*(xQ1a3a)-M213                |
| RP16 | 1 | 15    | 13      | 30       | 24     | 9      | 11     | 13     | 17-17  | E1b1b1 - M35                   |
| RP17 | 1 | 17    | 13      | 31       | 25     | 10     | 12     | 14     | 12-15  | F*(xQ1a3a)-M213                |
| RP18 | 1 | 16    | 13      | 30       | 25     | 11     | 11     | 13     | 11-14  | F*(xQ1a3a)-M213                |
| RP19 | 2 | 14    | 14      | 30       | 24     | 10     | 13     | 13     | 11-14  | F*(xQ1a3a)-M213                |
| RP20 | 1 | 14    | 13      | 31       | 24     | 11     | 11     | 15     | 15-16  | E1b1b1 - M35                   |
| RP21 | 1 | 13    | 13      | 30       | 24     | 9      | 11     | 13     | 17-17  | E1b1b1 - M35                   |
| RP22 | 1 | 14    | 13      | 30       | 23     | 10     | 11     | 12     | 13-18  | F*(xQ1a3a)-M213                |
| RP23 | 1 | 14    | 13      | 29       | 24     | 10     | 13     | 13     | 13-13  | F*(xQ1a3a)-M213                |
| RP24 | 1 | 14    | 14      | 30       | 25     | 10     | 13     | 14     | 11-14  | F*(xQ1a3a)-M213                |
| RP25 | 1 | 15    | 13      | 29       | 24     | 10     | 11     | 12     | 14-17  | F*(xQ1a3a)-M213                |
| RP26 | 1 | 14    | 13      | 30       | 24     | 10     | 13     | 14     | 14-14  | F*(xQ1a3a)-M213                |
| RP27 | 1 | 15    | 12      | 30       | 22     | 10     | 11     | 14     | 14-15  | F*(xQ1a3a)-M213                |
| RP28 | 1 | 14    | 13      | 29       | 25     | 10     | 13     | 13     | 11-14  | F*(xQ1a3a)-M213                |
| RP29 | 1 | 15    | 12      | 28       | 24     | 10     | 11     | 12     | 13-18  | F*(xQ1a3a)-M213                |
| RP30 | 1 | 14    | 13      | 29       | 24     | 10     | 11     | 12     | 14-15  | F*(xQ1a3a)-M213                |
| RP31 | 1 | 14    | 13      | 31       | 24     | 10     | 13     | 13     | 11-14  | F*(xQ1a3a)-M213                |
| RP32 | 1 | 15    | 13      | 30       | 24     | 10     | 13     | 13     | 11-14  | F*(xQ1a3a)-M213                |
| RP33 | 1 | 14    | 14      | 30       | 24     | 10     | 11     | 12     | 13-19  | F*(xQ1a3a)-M213                |
| RP34 | 1 | 14    | 14      | 31       | 24     | 11     | 13     | 15     | 11-14  | F*(xQ1a3a)-M213                |
| RP35 | 1 | 15    | 13      | 30       | 21     | 10     | 12     | 13     | 11-12  | A*                             |
| RP36 | 1 | 14    | 12      | 29       | 23     | 10     | 15     | 13     | 13-18  | Q1a3a - M3                     |
| RP37 | 1 | 16    | 13      | 30       | 25     | 10     | 11     | 13     | 11-13  | F*(xQ1a3a)-M213                |
| RP38 | 1 | 15    | 13      | 29       | 23     | 11     | 13     | 13     | 11-14  | F*(xQ1a3a)-M213                |
| RP39 | 1 | 15    | 13      | 30       | 21     | 11     | 11     | 13     | 17-19  | E1b1a - M2                     |
| RP40 | 1 | 17    | 14      | 30       | 25     | 10     | 11     | 13     | 14-17  | E1b1b1 - M35                   |
| RP41 | 1 | 14    | 14      | 30       | 24     | 10     | 11     | 12     | 13-17  | F*(xQ1a3a)-M213                |
| RP42 | 1 | 14    | 14      | 30       | 24     | 10     | 11     | 13     | 13-15  | F*(xQ1a3a)-M213                |
| RP43 | 1 | 14    | 12      | 29       | 22     | 10     | 11     | 13     | 14-15  | F*(xQ1a3a)-M213                |
| RP44 | 1 | 14    | 10      | 26       | 24     | 11     | 14     | 13     | 12-14  | F*(xQ1a3a)-M213                |
| RP45 | 1 | 15    | 13      | 29       | 24     | 11     | 13     | 13     | 9-14   | F*(xQ1a3a)-M213                |
| RP46 | 1 | 14    | 13      | 28       | 24     | 11     | 13     | 13     | 11-14  | F*(xQ1a3a)-M213                |
| RP47 | 1 | 15    | 12      | 28       | 24     | 10     | 11     | 12     | 15-17  | F*(xQ1a3a)-M213                |
| RP48 | 1 | 13    | 14      | 31       | 24     | 10     | 11     | 13     | 13-15  | Y* (A,E1b1a-b,F*) - SRY10831.1 |
| RP49 | 1 | 14    | 13      | 29       | 24     | 10     | 13     | 13     | 11-14  | F*(xQ1a3a)-M213                |
| RP50 | 1 | 15    | 12      | 28       | 22     | 10     | 11     | 13     | 13-14  | F*(xQ1a3a)-M213                |

Table S2. Y chromosome haplotype distribution in the Ribeirão Preto population sample (N=65) (Cont.).

|      |   |       |    |    |    |    |    |    |       |                 |
|------|---|-------|----|----|----|----|----|----|-------|-----------------|
| RP51 | 1 | 14    | 12 | 28 | 23 | 10 | 12 | 13 | 11-14 | F*(xQ1a3a)-M213 |
| RP52 | 1 | 15    | 12 | 27 | 25 | 10 | 14 | 13 | 13-16 | F*(xQ1a3a)-M213 |
| RP53 | 1 | 14    | 14 | 30 | 24 | 11 | 13 | 13 | 10-13 | F*(xQ1a3a)-M213 |
| RP54 | 1 | 16    | 13 | 29 | 23 | 11 | 12 | 14 | 15-16 | F*(xQ1a3a)-M213 |
| RP55 | 1 | 13    | 14 | 31 | 24 | 11 | 11 | 12 | 16-18 | E1b1b1 - M35    |
| RP56 | 1 | 15    | 12 | 29 | 25 | 10 | 11 | 12 | 13-17 | F*(xQ1a3a)-M213 |
| RP57 | 1 | 14    | 12 | 28 | 25 | 10 | 13 | 13 | 11-14 | F*(xQ1a3a)-M213 |
| RP58 | 1 | 14-15 | 12 | 28 | 22 | 10 | 11 | 14 | 12-13 | F*(xQ1a3a)-M213 |
