# Supplementary material for: Analysis of paternal lineages in Brazilian and African populations
Source: PubMed Central journal article supplement (PMC3036106; doi:10.1590/s1415-47572010005000067), 2010-09-01
Supplement: gmb-33-3-422-suppl3.pdf [file gmb-33-3-422-suppl3.pdf]

Table S3. Y chromosome haplotype distribution in the Guinea Bissau population sample (N=32).

| code | n | DYS19 | DYS389I | DYS389II | DYS390 | DYS391 | DYS392 | DYS393 | DYS385 |
|------|---|-------|---------|----------|--------|--------|--------|--------|--------|
| G1   | 1 | 13    | 13      | 31       | 24     | 10     | 12     | 14     | 16,17  |
| G2   | 1 | 14    | 13      | 30       | 23     | 10     | 11     | 14     | 11,14  |
| G3   | 1 | 15    | 12      | 29       | 22     | 11     | 11     | 13     | 14,14  |
| G4   | 1 | 15    | 13      | 30       | 21     | 10     | 11     | 14     | 14,14  |
| G5   | 1 | 15    | 13      | 30       | 21     | 10     | 11     | 15     | 16,16  |
| G6   | 1 | 15    | 13      | 30       | 22     | 11     | 11     | 13     | 15,15  |
| G7   | 1 | 15    | 13      | 31       | 21     | 10     | 11     | 13     | 16,17  |
| G8   | 1 | 15    | 13      | 31       | 21     | 10     | 11     | 13     | 16,19  |
| G9   | 1 | 15    | 13      | 32       | 21     | 10     | 11     | 14     | 15,16  |
| G10  | 1 | 15    | 13      | 32       | 21     | 11     | 11     | 14     | 15,15  |
| G11  | 1 | 15    | 14      | 30       | 21     | 10     | 11     | 14     | 16,18  |
| G12  | 2 | 15    | 14      | 31       | 21     | 10     | 11     | 14     | 14,14  |
| G13  | 1 | 15    | 14      | 32       | 23     | 11     | 11     | 13     | 17,17  |
| G14  | 1 | 15    | 15      | 32       | 22     | 10     | 11     | 14     | 14,16  |
| G15  | 1 | 16    | 12      | 30       | 22     | 10     | 11     | 13     | 14,16  |
| G16  | 1 | 16    | 12      | 30       | 22     | 11     | 11     | 13     | 15,17  |
| G17  | 1 | 16    | 13      | 29       | 21     | 10     | 11     | 14     | 15,15  |
| G18  | 1 | 16    | 13      | 30       | 21     | 10     | 11     | 13     | 16,17  |
| G19  | 1 | 16    | 13      | 30       | 21     | 10     | 11     | 14     | 17,17  |
| G20  | 1 | 16    | 13      | 30       | 21     | 10     | 12     | 15     | 16,17  |
| G21  | 1 | 16    | 14      | 30       | 21     | 10     | 11     | 14     | 17,17  |
| G22  | 1 | 16    | 14      | 30       | 22     | 10     | 11     | 13     | 17,17  |
| G23  | 1 | 17    | 12      | 29       | 22     | 10     | 11     | 13     | 14,17  |
| G24  | 1 | 17    | 13      | 30       | 20     | 10     | 11     | 14     | 15,17  |
| G25  | 1 | 17    | 13      | 30       | 21     | 10     | 11     | 14     | 16,18  |
| G26  | 1 | 17    | 13      | 31       | 20     | 11     | 11     | 15     | 16,16  |
| G27  | 1 | 17    | 14      | 31       | 22     | 10     | 11     | 13     | 15,16  |
| G28  | 3 | 17    | 14      | 31       | 22     | 10     | 11     | 13     | 16,17  |
| G29  | 1 | 17    | 14      | 31       | 22     | 10     | 11     | 13     | 17,17  |
