# Supplementary material for: Analysis of paternal lineages in Brazilian and African populations
Source: PubMed Central journal article supplement (PMC3036106; doi:10.1590/s1415-47572010005000067), 2010-09-01
Supplement: gmb-33-3-422-suppl4.pdf [file gmb-33-3-422-suppl4.pdf]

Table S4. Y chromosome haplotype distribution in the Angola population sample (N=48).

| code | n | DYS19 | DYS389I | DYS389II | DYS390 | DYS391 | DYS392 | DYS393 | DYS385 |
|------|---|-------|---------|----------|--------|--------|--------|--------|--------|
| A1   | 2 | 14    | 12      | 28       | 25     | 10     | 11     | 13     | 14,20  |
| A2   | 1 | 14    | 12      | 28       | 25     | 11     | 11     | 13     | 14,20  |
| A3   | 1 | 14    | 12      | 28       | 26     | 11     | 11     | 13     | 14,19  |
| A4   | 1 | 14    | 13      | 30       | 21     | 10     | 11     | 14     | 14,19  |
| A5   | 2 | 15    | 12      | 28       | 22     | 10     | 11     | 14     | 12,13  |
| A6   | 1 | 15    | 12      | 29       | 21     | 10     | 11     | 14     | 16,17  |
| A7   | 1 | 15    | 13      | 30       | 21     | 10     | 11     | 13     | 15,18  |
| A8   | 1 | 15    | 13      | 30       | 21     | 10     | 11     | 13     | 16,17  |
| A9   | 1 | 15    | 13      | 30       | 21     | 10     | 11     | 13     | 16,18  |
| A10  | 2 | 15    | 13      | 30       | 21     | 10     | 11     | 13     | 17,17  |
| A11  | 1 | 15    | 13      | 30       | 21     | 10     | 11     | 14     | 12,16  |
| A12  | 1 | 15    | 13      | 30       | 21     | 10     | 11     | 14     | 14,18  |
| A13  | 1 | 15    | 13      | 30       | 21     | 10     | 11     | 14     | 15,16  |
| A14  | 2 | 15    | 13      | 30       | 21     | 11     | 11     | 13     | 16,17  |
| A15  | 1 | 15    | 13      | 30       | 21     | 11     | 11     | 14     | 16,17  |
| A16  | 1 | 15    | 13      | 31       | 21     | 10     | 11     | 13     | 15,15  |
| A17  | 1 | 15    | 13      | 31       | 21     | 10     | 11     | 13     | 15,17  |
| A18  | 1 | 15    | 13      | 31       | 21     | 10     | 11     | 13     | 16,16  |
| A19  | 2 | 15    | 13      | 31       | 21     | 10     | 11     | 13     | 16,17  |
| A20  | 1 | 15    | 13      | 31       | 21     | 10     | 11     | 13     | 17,17  |
| A21  | 1 | 15    | 13      | 31       | 21     | 10     | 11     | 13     | 17,18  |
| A22  | 2 | 15    | 13      | 31       | 21     | 11     | 11     | 13     | 16,17  |
| A23  | 1 | 15    | 13      | 31       | 21     | 12     | 11     | 13     | 16,17  |
| A24  | 1 | 15    | 14      | 30       | 24     | 12     | 13     | 13     | 16,17  |
| A25  | 1 | 15    | 14      | 31       | 21     | 10     | 11     | 13     | 15,19  |
| A26  | 1 | 15    | 14      | 32       | 21     | 11     | 11     | 13     | 15,17  |
| A27  | 1 | 15    | 14      | 32       | 24     | 10     | 11     | 13     | 11,11  |
| A28  | 1 | 15    | 14      | 33       | 21     | 10     | 11     | 13     | 15,20  |
| A29  | 1 | 16    | 12      | 30       | 24     | 10     | 11     | 13     | 11,11  |
| A30  | 1 | 16    | 13      | 29       | 21     | 10     | 11     | 15     | 16,16  |
| A31  | 1 | 16    | 13      | 30       | 21     | 10     | 11     | 14     | 15,17  |
| A32  | 1 | 16    | 13      | 30       | 21     | 10     | 11     | 14     | 18,18  |
| A33  | 1 | 16    | 13      | 30       | 21     | 11     | 11     | 13     | 17,17  |
| A34  | 1 | 16    | 13      | 30       | 21     | 11     | 11     | 14     | 16,18  |
| A35  | 1 | 16    | 13      | 31       | 21     | 10     | 11     | 15     | 16,17  |
| A36  | 1 | 16    | 13      | 31       | 21     | 11     | 11     | 13     | 17,17  |
| A37  | 1 | 16    | 14      | 31       | 21     | 10     | 11     | 15     | 16,20  |
| A38  | 1 | 16    | 14      | 32       | 25     | 10     | 11     | 13     | 11,11  |
| A39  | 1 | 17    | 13      | 30       | 21     | 11     | 11     | 15     | 17,19  |
| A40  | 1 | 17    | 13      | 30       | 21     | 11     | 11     | 15     | 18,19  |
| A41  | 1 | 17    | 14      | 31       | 21     | 10     | 11     | 15     | 16,18  |
| A42  | 1 | 17    | 14      | 32       | 21     | 10     | 11     | 13     | 17,18  |
