# Supplementary material for: Analysis of paternal lineages in Brazilian and African populations
Source: PubMed Central journal article supplement (PMC3036106; doi:10.1590/s1415-47572010005000067), 2010-09-01
Supplement: gmb-33-3-422-suppl5.pdf [file gmb-33-3-422-suppl5.pdf]

Table S5. Y chromosome haplotype distribution in the Mozambique population sample (N=36).

| code | n | DYS19 | DYS389I | DYS389II | DYS390 | DYS391 | DYS392 | DYS393 | DYS385 |
|------|---|-------|---------|----------|--------|--------|--------|--------|--------|
| Mo1  | 1 | 12    | 13      | 30       | 21     | 10     | 11     | 14     | 17,18  |
| Mo2  | 1 | 13    | 11      | 29       | 23     | 11     | 11     | 14     | 16,16  |
| Mo3  | 1 | 14    | 12      | 28       | 24     | 11     | 11     | 13     | 13,19  |
| Mo4  | 2 | 14    | 12      | 28       | 24     | 11     | 11     | 13     | 14,19  |
| Mo5  | 1 | 14    | 12      | 28       | 27     | 10     | 11     | 13     | 13,19  |
| Mo6  | 2 | 14    | 13      | 30       | 21     | 11     | 11     | 14     | 16,16  |
| Mo7  | 1 | 14    | 13      | 31       | 23     | 10     | 10     | 14     | 14,17  |
| Mo8  | 1 | 15    | 12      | 26       | 20     | 10     | 11     | 13     | 15,17  |
| Mo9  | 1 | 15    | 12      | 30       | 21     | 10     | 11     | 13     | 17,18  |
| Mo10 | 1 | 15    | 13      | 30       | 21     | 10     | 11     | 13     | 16,17  |
| Mo11 | 1 | 15    | 13      | 30       | 21     | 10     | 11     | 14     | 16,16  |
| Mo12 | 1 | 15    | 13      | 30       | 21     | 10     | 11     | 14     | 17,17  |
| Mo13 | 1 | 15    | 13      | 30       | 21     | 11     | 11     | 13     | 16,17  |
| Mo14 | 1 | 15    | 13      | 30       | 21     | 12     | 11     | 14     | 16,17  |
| Mo15 | 1 | 15    | 13      | 31       | 21     | 10     | 11     | 13     | 16,16  |
| Mo16 | 1 | 15    | 13      | 31       | 21     | 10     | 11     | 13     | 16,18  |
| Mo17 | 1 | 15    | 13      | 31       | 21     | 10     | 11     | 14     | 15,20  |
| Mo18 | 1 | 15    | 14      | 28       | 25     | 11     | 11     | 13     | 10,15  |
| Mo19 | 1 | 15    | 14      | 31       | 21     | 10     | 11     | 13     | 15,17  |
| Mo20 | 1 | 15    | 14      | 31       | 21     | 11     | 11     | 14     | 15,20  |
| Mo21 | 1 | 15    | 14      | 32       | 24     | 10     | 11     | 13     | 11,11  |
| Mo22 | 1 | 15    | 14      | 32       | 24     | 10     | 12     | 15     | 11,12  |
| Mo23 | 1 | 15    | 14      | 32       | 24     | 11     | 11     | 13     | 11,11  |
| Mo24 | 1 | 15    | 14      | 33       | 24     | 10     | 13     | 13     | 11,12  |
| Mo25 | 1 | 16    | 12      | 28       | 25     | 10     | 11     | 13     | 11,14  |
| Mo26 | 1 | 16    | 13      | 30       | 20     | 10     | 11     | 16     | 16,18  |
| Mo27 | 1 | 16    | 14      | 31       | 21     | 10     | 11     | 14     | 17,18  |
| Mo28 | 1 | 16    | 14      | 32       | 24     | 11     | 11     | 13     | 10,11  |
| Mo29 | 1 | 17    | 13      | 30       | 21     | 10     | 11     | 14     | 16,16  |
| Mo30 | 1 | 17    | 13      | 30       | 21     | 10     | 11     | 14     | 16,17  |
| Mo31 | 1 | 17    | 13      | 30       | 21     | 10     | 11     | 14     | 17,17  |
| Mo32 | 1 | 17    | 13      | 30       | 25     | 10     | 11     | 15     | 17,18  |
| Mo33 | 1 | 17    | 13      | 31       | 21     | 10     | 11     | 14     | 17,18  |
| Mo34 | 1 | 17    | 15      | 32       | 21     | 10     | 11     | 14     | 15,19  |
